# Supplementary material for: Enterorenal crosstalks in diabetic nephropathy and novel therapeutics targeting the gut microbiota: Gut-kidney axis in diabetic nephropathy
Source: PubMed Central journal article supplement — Acta Biochim Biophys Sin (Shanghai). 2022 Oct 11;54(10):1406–20. doi: 10.3724/abbs.2022140 (PMC9827797; doi:10.3724/abbs.2022140), 2022-10-11
Supplement: 22307Tables.pdf [file 22307Tables.pdf]

**Table 1. Changes of gut microbiota composition in renal diseases**

| Subject                                    | Changes in gut microbiota                                                 |                                                                                    |                                                                                                                                            | Functional effects and/or relevance                                   | Reference |
|--------------------------------------------|---------------------------------------------------------------------------|------------------------------------------------------------------------------------|--------------------------------------------------------------------------------------------------------------------------------------------|-----------------------------------------------------------------------|-----------|
|                                            | Phylum level                                                              | Family level                                                                       | Genus/Species level                                                                                                                        |                                                                       |           |
| Mice with diabetic nephropathy             | <i>Actinobacteria</i> ↑                                                   | Unknown                                                                            | <i>Prevotella</i> ↓, <i>Rikenella</i> ↓, <i>Bifidobacterium</i> ↓, <i>Ruminococcus</i> ↓, <i>Bacteroides acidifaciens</i> ↓                | Related to SCFAs production                                           | 15        |
| Rats with diabetic nephropathy             | <i>Actinobacteria</i> ↑<br><i>Firmicutes</i> ↓<br><i>Proteobacteria</i> ↓ | <i>S24-7</i> ↓                                                                     | <i>Turicibacter</i> ↑, <i>Coprobacillus</i> ↑<br><i>Prevotella</i> ↓, <i>Clostridium</i> ↓<br><i>Ruminococcus</i> ↓, <i>Oscillospira</i> ↓ | Associated with the progression of diabetic nephropathy               | 19        |
| 14 T2DM patients with diabetic nephropathy | Unknown                                                                   | <i>Coriobacteriaceae</i> ↑, <i>Prevotellaceae</i> ↓                                | <i>Escherichia-Shigella</i> ↑<br><i>Prevotella_9</i> ↓                                                                                     | Contributed to the physiopathological diagnosis of DN from DM         | 20        |
| Mice with diabetic nephropathy             | <i>Firmicutes</i> ↓                                                       | Unknown                                                                            | <i>Anaerospobacter</i> ↑<br><i>Allobaculum</i> ↑, <i>Blautia</i> ↓                                                                         | Gut flora may contribute to the heterogeneity of the induced response | 21        |
| Rats with diabetic nephropathy             | Unknown                                                                   | <i>Coriobacteriaceae</i> ↑<br><i>Erysipelotrichaceae</i> ↑                         | <i>Adlercreutzia</i> ↑                                                                                                                     | Related to proteinuria in diabetic nephropathy                        | 22        |
| Rats with diabetic nephropathy             | Unknown                                                                   | <i>Peptostreptococcaceae</i> ↑<br><i>Rikenellaceae</i> ↓, <i>Ruminococacceae</i> ↓ | <i>Turicibacter</i> ↑, <i>Desulfovibrio</i> ↑<br><i>SMB53</i> ↑, <i>Clostridium</i> ↓<br><i>Lactobacillus</i> ↓                            | Related to the metabolic disorder of diabetic nephropathy             | 45        |

|                                                      |                                                                                |                                                                                                                                               |                                              |                                                                                                                                                         |                                                                                                     |        |
|------------------------------------------------------|--------------------------------------------------------------------------------|-----------------------------------------------------------------------------------------------------------------------------------------------|----------------------------------------------|---------------------------------------------------------------------------------------------------------------------------------------------------------|-----------------------------------------------------------------------------------------------------|--------|
| 24 patients with ESRD and uremic animals             | <i>Actinobacteria</i> ↑<br><i>Firmicutes</i> ↑<br><i>Proteobacteria</i> ↑      | <i>Brachybacterium</i> ↑<br><i>Enterobacteriaceae</i> ↑,<br><i>Halomonadaceae</i> ↑,<br><i>Lactobacillaceae</i> ↓,<br><i>Prevotellaceae</i> ↓ | <i>Thiothrix</i> ↑<br><i>Nesterenkonia</i> ↑ | Unknown                                                                                                                                                 | Changes in the biochemical environment caused by uremia and its therapeutic intervention            | 24     |
| Mice with bilateral I/R injury                       | Unknown                                                                        | <i>Enterobacteriaceae</i> ↑<br><i>Ruminococcaceae</i> ↓                                                                                       |                                              | <i>Lactobacilli</i> ↓                                                                                                                                   | The hallmarks of I/R induced dysbiosis, associated with SCFAs reduction and intestinal inflammation | 46     |
| Mice with unilateral I/R injury                      | Unknown                                                                        | Unknown                                                                                                                                       |                                              | <i>Clostridium</i> ↑,<br><i>Bifidobacterium</i> ↓,<br><i>TM7</i> ↓                                                                                      | Related to D-Serine/L-Serine level and tubular damage/tubular cell proliferation                    | 47     |
| 855 individuals with early renal function decline    | Unknown                                                                        | <i>Christensenellaceae</i> ↑<br><i>Ruminococcaceae</i> ↑,<br><i>Lachnospiraceae</i> ↑                                                         |                                              | Unknown                                                                                                                                                 | Related to circulating metabolites derived from bacterial protein fermentation and eGFR             | 48     |
| 65 patients with CKD                                 | Unknown                                                                        | Unknown                                                                                                                                       |                                              | <i>Roseburia</i> spp.↓<br><i>Faecalibacterium prausnitzii</i> ↓                                                                                         | Butyrate-producing bacteria are negatively associated with renal function                           | 49     |
| 892 adults with kidney disease/52 patients with ESRD | <i>Proteobacteria</i> ↑<br><i>Verrucomicrobia</i> ↑<br><i>Actinobacteria</i> ↓ | <i>Enterobacteriaceae</i> ↑<br><i>Streptococcaceae</i> ↑,<br><i>Prevotellaceae</i> ↓                                                          |                                              | <i>Streptococcus</i> ↑,<br><i>Prevotella</i> ↓,<br><i>Prevotella</i> 9↓,<br><i>Faecalibacterium</i> ↓,<br><i>Clostridium</i> ↓,<br><i>Coprococcus</i> ↓ | Uremic toxin generation in adults with kidney disease at the expense of producing less butyrate     | 50, 51 |

**Table 2. Effects of diabetic drugs on gut microbiota and renal outcomes**

| Agents                        | Drugs       | Effect on gut microbiota                                                                               |                                                                                                                                      |                                                                                                                                                                                                                              | Effect on renal outcomes                                               | Reference                                                                        |         |
|-------------------------------|-------------|--------------------------------------------------------------------------------------------------------|--------------------------------------------------------------------------------------------------------------------------------------|------------------------------------------------------------------------------------------------------------------------------------------------------------------------------------------------------------------------------|------------------------------------------------------------------------|----------------------------------------------------------------------------------|---------|
|                               |             | Phylum level                                                                                           | Family level                                                                                                                         | Genus/Species level                                                                                                                                                                                                          |                                                                        |                                                                                  |         |
| GLP-1<br>receptor<br>agonists | Exenatide   | Unknown                                                                                                | Unknown                                                                                                                              | Unknown                                                                                                                                                                                                                      | Reduce albuminuria and pathological renal injury                       | 121,122                                                                          |         |
|                               | Liraglutide | <i>Bacteroides</i> ↑<br><i>Verrucomicrobia</i> ↑<br><i>Proteobacteria</i> ↓<br><i>Actinobacteria</i> ↓ | <i>Rikenellaceae</i> ↑, <i>S24-7</i> ↑<br><i>Erysipelotrichaceae</i> ↑<br><i>Lachnospiraceae</i> ↓<br><i>Peptostreptococcaceae</i> ↓ | <i>Akkermansia</i> ↑, <i>Romboutsia</i> ↑<br><i>Anaerotruncus</i> ↓, <i>Klebsiella</i> ↓<br><i>Lachnospiraceae_UCG-001</i> ↓<br><i>Lachnospiraceae_NK4A136_group</i> ↓<br><i>Ruminiclostridium</i> ↓, <i>Desulfovibrio</i> ↓ | Reduce the incidence of nephropathy and macroalbuminuria               | 125,127,<br>129, 130                                                             |         |
|                               |             |                                                                                                        | Unknown                                                                                                                              | <i>Aerococcus</i> ↑,<br><i>Bacteroides</i> ↑,<br><i>Ruminococcus</i> ↑,<br><i>Coprobacillus</i> ↓                                                                                                                            | <i>Akkermansia</i> ↑<br><i>Barnesiella</i> ↑<br><i>Oscillibacter</i> ↑ | Lower the incidence in new-onset large albuminuria and sustained decline of eGFR | 131,133 |
|                               |             |                                                                                                        | Unknown                                                                                                                              | Unknown                                                                                                                                                                                                                      | Unknown                                                                | Improve UACR                                                                     | 134,135 |

|                      |               |                                                                                                                       |                                                            |                                                                                                                                                                       |                                                                        |                 |
|----------------------|---------------|-----------------------------------------------------------------------------------------------------------------------|------------------------------------------------------------|-----------------------------------------------------------------------------------------------------------------------------------------------------------------------|------------------------------------------------------------------------|-----------------|
| DPP-4<br>inhibitors  | Linagliptin   | <i>Bacteroides</i> ↑, <i>Actinobacteria</i> ↓<br><i>Proteobacteria</i> ↓                                              | Unknown                                                    | Unknown                                                                                                                                                               | Reduce proteinuria and<br>improve renal injury                         | 140,142,143     |
|                      | Alogliptin    | Unknown                                                                                                               | Unknown                                                    | Unknown                                                                                                                                                               | Improve UACR and maintain<br>eGFR                                      | 144             |
|                      | Saxagliptin   | <i>Firmicutes</i> ↑, <i>Bacteroides</i> ↓                                                                             | <i>Erysipelotrichaceae</i> ↑,<br><i>Bacteroidaceae</i> ↓   | <i>Lactobacillus</i> ↑, <i>Allobaculum</i> ↑<br><i>Turicibacter</i> ↑, <i>Prevotella</i> ↓                                                                            | Improve UACR                                                           | 147,148         |
|                      | Sitagliptin   | <i>Bacteroides</i> ↑, <i>Proteobacteria</i> ↑<br><i>Actinobacteria</i> ↑, <i>Firmicutes</i> ↓<br><i>Tenericutes</i> ↓ | <i>Ruminococcaceae</i> ↑                                   | <i>Roseburia</i> ↑, <i>Bifidobacterium</i> ↑<br><i>Blautia</i> ↓                                                                                                      | Reduce urinary albumin<br>levels                                       | 150,151         |
|                      | Canagliflozin | <i>Actinobacteria</i> ↓, <i>TM-7</i> ↓                                                                                | Unknown                                                    | <i>Alistipes</i> ↑, <i>Alloprevotella</i> ↑<br><i>Olsenella</i> ↑, <i>Oscillospira</i> ↓<br><i>Bifidobacterium</i> ↓,<br><i>Helicobacter</i> ↓ <i>Mucispirillum</i> ↓ | Reduce plasma uremic toxins<br>and lower UACR                          | 155,157,<br>158 |
| SGLT-2<br>inhibitors | Dapagliflozin | <i>Firmicutes</i> ↑, <i>Proteobacteria</i> ↑<br><i>Bacteroides</i> ↓, <i>Actinobacteria</i> ↓                         | <i>Desulfovibrionaceae</i> ↑,<br><i>Lactobacillaceae</i> ↓ | <i>Oscillospira</i> ↓, <i>Mucispirillum</i> ↓<br><i>Barnesiella</i> ↓                                                                                                 | Prevent progression of kidney<br>disease                               | 160–163         |
|                      | Empagliflozin | <i>Bacteroides</i> ↑, <i>Firmicutes</i> ↓                                                                             | Unknown                                                    | <i>Bacteroides</i> ↑, <i>Bifidobacterium</i> ↑<br><i>Parabacteroides</i> ↑                                                                                            | Reduce the risk of<br>nephropathy, proteinuria and<br>serum creatinine | 133,164,<br>165 |

Ertugliflozin

Unknown

Unknown

Unknown

Reduce the risk of renal  
composite endpoint and 167,168  
preserve eGFR and UACR

---
